# Supplementary material
Source: Springer Nature journal article supplement (https://www.springermedizin.de/resource/supplementary/12889_2010_2760_MOESM2_ESM.pdf/9488356)
Supplement: MOESM2 [file 9488356]

**Cumulative probability of remaining free of diabetes**

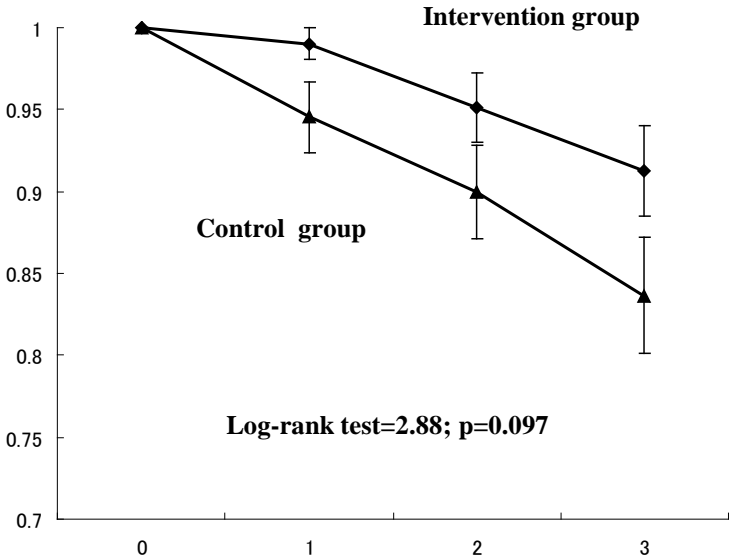

|                                  |     |     |     |
|----------------------------------|-----|-----|-----|
| Total number                     | 213 | 204 | 196 |
| Cumulative number with diabetes: |     |     |     |
| Intervention group               | 1   | 5   | 9   |
| Control group                    | 7   | 11  | 18  |
